## CORRECTION

# Correction: Limited access to improved drinking water, unimproved drinking water, and toilet facilities among households in Ethiopia: *Spatial and mixed effect analysis*

Daniel Gashaneh Belay, Zewudu Andualem

The second author's name is spelled incorrectly. The correct name is: Zewudu Andualem. The correct citation is: Belay DG, Andualem Z (2022) Limited access to improved drinking water, unimproved drinking water, and toilet facilities among households in Ethiopia: *Spatial and mixed effect analysis*. PLoS ONE 17(4): e0266555. <https://doi.org/10.1371/journal.pone.0266555>.

## Reference

1. Belay DG, Andualem Z (2022) Limited access to improved drinking water, unimproved drinking water, and toilet facilities among households in Ethiopia: *Spatial and mixed effect analysis*. PLoS ONE 17(4): e0266555. <https://doi.org/10.1371/journal.pone.0266555>

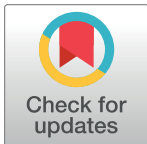

## OPEN ACCESS

**Citation:** Belay DG, Andualem Z (2024) Correction: Limited access to improved drinking water, unimproved drinking water, and toilet facilities among households in Ethiopia: *Spatial and mixed effect analysis*. PLoS ONE 19(5): e0303771. <https://doi.org/10.1371/journal.pone.0303771>

**Published:** May 9, 2024

**Copyright:** © 2024 Belay, Andualem. This is an open access article distributed under the terms of the [Creative Commons Attribution License](https://creativecommons.org/licenses/by/4.0/), which permits unrestricted use, distribution, and reproduction in any medium, provided the original author and source are credited.
